# Supplementary material for: A superfolder variant of pH-sensitive pHluorin for in vivo pH measurements in the endoplasmic reticulum
Source: Springer Nature journal article supplement (doi:10.1038/s41598-018-30367-z), 2018-08-06
Supplement: MOESM1 [file 41598_2018_30367_MOESM1_ESM.pdf]

# Supplementary Information

## A superfolder variant of pH-sensitive pHLuorin for *in vivo* pH measurements in the endoplasmic reticulum

Mara Reifenrath<sup>1</sup> and Eckhard Boles<sup>1</sup>

<sup>1</sup> Institute of Molecular Biosciences, Faculty of Biological Sciences, Goethe University Frankfurt, Max-von-Laue Straße 9, 60438 Frankfurt am Main, Germany

**Figure S1. pH dependence of excitation spectra of cytosolically located, conventional pHLuorin** The cells were permeabilized with digitonin and resuspended in citric acid/Na<sub>2</sub>HPO<sub>4</sub> buffer of pH values ranging from 5.0 to 9.0 to an OD<sub>600</sub> of 0.5. The emission intensity was recorded at 508 nm.

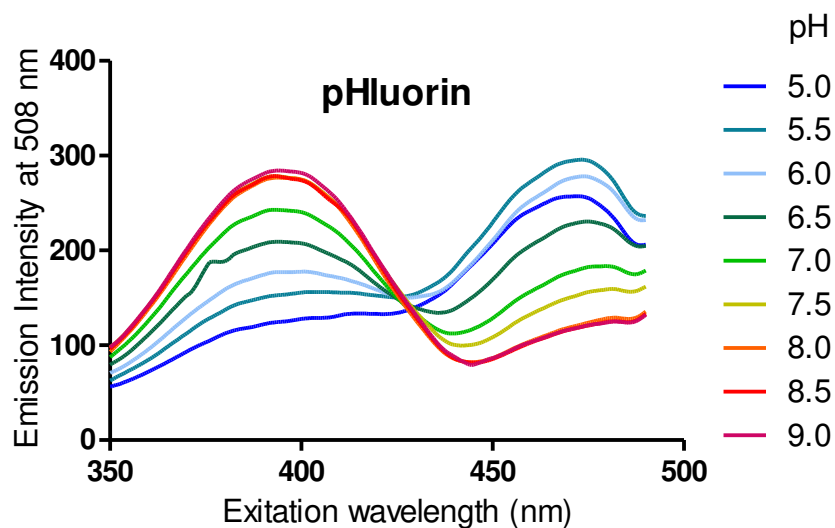

**Figure S2. pH calibration and sigmoidal dose response fits for CEN.PK2-1C expressing sfpHluorin (A) and ER-sfpHluorin (B) grown in If-SCD with 0.1 mM methionine.** The graphs show the mean and standard error (mean±s.d.) of biological triplicates.

**S5 A)**

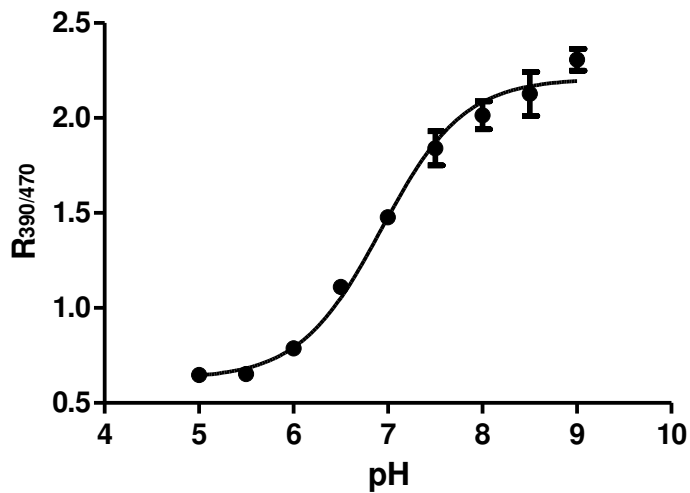

|                                 |                          |
|---------------------------------|--------------------------|
| <b>Best-fit values</b>          |                          |
| Bottom                          | 0,6269                   |
| Top                             | 2,208                    |
| LogEC50                         | 6,934                    |
| EC50                            | 8,596e+006               |
| <b>Std. Error</b>               |                          |
| Bottom                          | 0,03009                  |
| Top                             | 0,02853                  |
| LogEC50                         | 0,04864                  |
| <b>95% Confidence Intervals</b> |                          |
| Bottom                          | 0.5648 to 0.6890         |
| Top                             | 2.150 to 2.267           |
| LogEC50                         | 6.834 to 7.035           |
| EC50                            | 6.822e+006 to 1.083e+007 |
| <b>Goodness of Fit</b>          |                          |
| Degrees of Freedom              | 24                       |
| R <sup>2</sup>                  | 0,9866                   |
| Absolute Sum of Squares         | 0,1415                   |
| Sy.x                            | 0,07677                  |

**S5 B)**

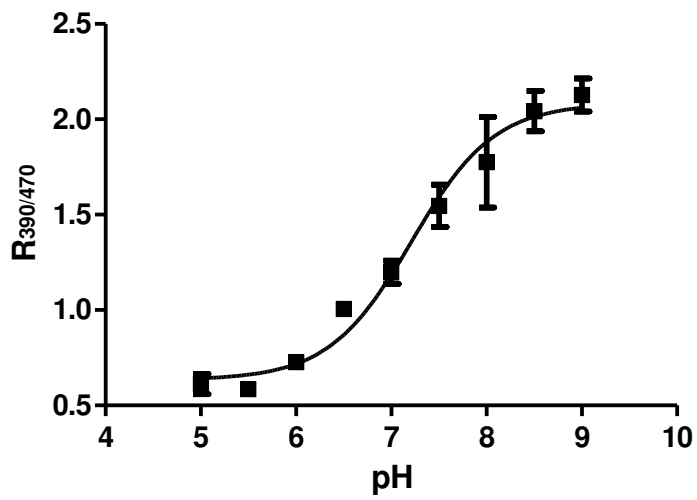

|                                 |                          |
|---------------------------------|--------------------------|
| <b>Best-fit values</b>          |                          |
| Bottom                          | 0,6339                   |
| Top                             | 2,084                    |
| LogEC50                         | 7,212                    |
| EC50                            | 1,628e+007               |
| <b>Std. Error</b>               |                          |
| Bottom                          | 0,04070                  |
| Top                             | 0,04838                  |
| LogEC50                         | 0,08036                  |
| <b>95% Confidence Intervals</b> |                          |
| Bottom                          | 0.5499 to 0.7179         |
| Top                             | 1.984 to 2.184           |
| LogEC50                         | 7.046 to 7.378           |
| EC50                            | 1.111e+007 to 2.385e+007 |
| <b>Goodness of Fit</b>          |                          |
| Degrees of Freedom              | 24                       |
| R <sup>2</sup>                  | 0,9643                   |
| Absolute Sum of Squares         | 0,3205                   |
| Sy.x                            | 0,1156                   |

**Table S1. DNA Sequence of all GFP variants used in this study**

| Name                                       | DNA sequence                                                                                                                                                                                                                                                                                                                                                                                                                                                                                                                                                                                                                                                                                                                                                                                                                                                                                                                                     | Reference                                  |
|--------------------------------------------|--------------------------------------------------------------------------------------------------------------------------------------------------------------------------------------------------------------------------------------------------------------------------------------------------------------------------------------------------------------------------------------------------------------------------------------------------------------------------------------------------------------------------------------------------------------------------------------------------------------------------------------------------------------------------------------------------------------------------------------------------------------------------------------------------------------------------------------------------------------------------------------------------------------------------------------------------|--------------------------------------------|
| <b>Superfolder GFP</b>                     | ATGAGCAAAGGAGAAGAAGCTTTTCACTGGAGTTGTCCCAATTCTTGTTGAATTAGATGG<br>TGATGTTAATGGGCACAAATTTTCTGTCCGTGGAGAGGGTGAAGGTGATGCTACAAACG<br>GAAAACCTACCCTTAAATTTATTTGCACTACTGGAAAACCTACCTGTTCCGTGGCCAACAC<br>TTGCACTACTCTGACCTATGGTGTTCATGCTTTTCCCGTTATCCGGATCACATGAAAC<br>GGCATGACTTTTTCAAGAGTGCCATGCCCCGAAGTTATGTACAGGAACGCACTATATCT<br>TTCAAAGATGACGGGACCTACAAGACGCGTGCTGAAGTCAAGTTTGAAGGTGATACCTT<br>TGTTAATCGTATCGAGTTAAAGGGTATTGATTTTAAAGAAGATGGAAACATTCTTGGACA<br>CAAACCTCGAGTACAACTTAACTCACACAATGTATACATCACGGCAGACAAACAAAAGA<br>ATGGAATCAAAGCTAACTTCAAATTCGCCACAACGTTGAAGATGGTTCGGTTCAACTA<br>GCAGACCATTATCAACAAAATACTCCAATTGGCGATGGCCCTGTCCTTTTACCAGACAAC<br>CATTACCTGTCGACACAATCTGTCCTTTCGAAAAGATCCCAACGAAAAGCGTGACCACAT<br>GGTCCTTCTTGAGTTTGTAAGTCTGCTGGGATTACACATGGCATGGATGAGCTCTACA<br>AATAA                                                                                                                                                     | Pédelacq et al., 2006                      |
| <b>pHluorin</b>                            | ATGAGTAAAGGAGAAGAAGCTTTTCACTGGAGTTGTCCCAATTCTTGTTGAATTAGATGGT<br>GATGTTAATGGGCACAAATTTTCTGTGTCAGTGGAGAGGGTGAAGGTGATGCAACATACG<br>GAAAACCTACCCTTAAATTTATTTGCACTACTGGAAAACCTACCTGTTCCATGGCCAACAC<br>TTGCACTACTTTCTTTATGGTGTTCATGCTTTTCAAGATACCCAGATCATATGAAACG<br>GCATGACTTTTTCAAGAGTGCCATGCCCCGAAGTTATGTACAGGAAAGAACTATATTTTT<br>CAAAGATGACGGGAACTACAAGACACGTGCTGAAGTCAAGTTTGAAGGTGATACCTTGT<br>TTAATAGAATCGAGTTAAAAGGTATTGATTTTAAAGATGATGGAAACATTCTTGGACACA<br>AATTGGAATACAACATAACGAGCACTTGGTGTACATCATGGCAGACAAACAAAAGAAT<br>GGTACCAAAGCTATCTTTCAAGTTCACCACAACATTGAAGATGGAGGCGTTCAACTAGC<br>AGACCATTATCAACAAAATACTCCAATTGGCGATGGCCCTGTCCTTTTACCAGACAACCA<br>TTACCTGCACACACAATCTGCCCTTTCGAAAAGATCCCAACGAAAAGAGAGACCACATGG<br>TCCTTCTTGAGTTTGTAACAGCTGCTGGGATTACACATGGCATGGATGAACTATACAAT<br>AA                                                                                                                                                    | Miesenböck et al., 1998; Orij et al., 2009 |
| <b>ER-pHluorin (SSBiP-sfpHluorin-HDEL)</b> | ATGTTTTTCAACAGACTAAGCGCTGGCAAGCTGCTGGTACCACTCTCCGTGGTCCTGTA<br>CGCCCTTTTCGTGGTAATATTACCTTTACAGAATCTTTCCACTCCTCCAATGTTTTAGTT<br>AGAGGTAGTAAAGGAGAAGAAGCTTTTCACTGGAGTTGTCCCAATTCTTGTTGAATTAGA<br>TGGTGTGTTAATGGGCACAAATTTTCTGTGTCAGTGGAGAGGGTGAAGGTGATGCAACAT<br>ACGGAAAACCTACCCTTAAATTTATTTGCACTACTGGAAAACCTACCTGTTCCATGGCCAA<br>CACTTGTCACTACTTTCTTTATGGTGTTCATGCTTTTCAAGATACCCAGATCATATGAA<br>ACGGCATGACTTTTTCAAGAGTGCCATGCCCCGAAGTTATGTACAGGAAAGAACTATAT<br>TTTTCAAAGATGACGGGAACTACAAGACACGTGCTGAAGTCAAGTTTGAAGGTGATACC<br>CTTGTTAATAGAATCGAGTTAAAAGGTATTGATTTTAAAGATGATGGAAACATTCTTGGA<br>CACAATTGGAATACAACATAACGAGCACTTGGTGTACATCATGGCAGACAAACAAA<br>GAATGGTACCAAAGCTATCTTTCAAGTTCACCACAACATTGAAGATGGAGGCGTTCAAC<br>TAGCAGACCATTATCAACAAAATACTCCAATTGGCGATGGCCCTGTCCTTTTACCAGACA<br>ACCATTACCTGCACACACAATCTGCCCTTTCGAAAAGATCCCAACGAAAAGAGAGACCAC<br>ATGGTCCTTCTTGAGTTTGTAACAGCTGCTGGGATTACACATGGCATGGATGAACTATA<br>CAAATTCGAACACGACGAATTGTAG | This study                                 |

|                                                           |                                                                                                                                                                                                                                                                                                                                                                                                                                                                                                                                                                                                                                                                                                                                                                                                                                                                                                                                           |            |
|-----------------------------------------------------------|-------------------------------------------------------------------------------------------------------------------------------------------------------------------------------------------------------------------------------------------------------------------------------------------------------------------------------------------------------------------------------------------------------------------------------------------------------------------------------------------------------------------------------------------------------------------------------------------------------------------------------------------------------------------------------------------------------------------------------------------------------------------------------------------------------------------------------------------------------------------------------------------------------------------------------------------|------------|
| <b>Superfolder pHluorin</b><br>(sfpHluorin)               | ATGAGCAAAGGAGAAGAAGAACTTTTCACTGGAGTTGTCCAATTCTTGTGAATTAGATGG<br>TGATGTTAATGGGCACAAATTTTCTGTCCGTGGAGAGGGTGAAGGTGATGCTACAAACG<br>GAAAACCTCACCTTAAATTTATTTGCACTACTGGAAAACCTGTTCCGTGGCCAACAC<br>TTGCACTACTCTGTCTTATGGTGTTCATGCTTTTCCCGTTATCCGGATCACATGAAAC<br>GGCATGACTTTTTCAAGAGTGCCATGCCCGAAGGTTATGTACAGGAACGCACATATATCT<br>TTCAAAGATGACGGGACCTACAAGACGCGTGCTGAAGTCAAGTTTGAAGGTGATACCCT<br>TGTTAATCGTATCGAGTTAAAGGGTATTGATTTTAAAGAAGATGGAAACATTCTTGGACA<br>CAAACCTCGAGTACAACCTTAAACGAGCACTTGGTATACATCACGGCAGACAAACAAAAGA<br>ATGGAACCAAAGCTATCTTCAAGTTCACCACAACGTTGAAGATGGTTCCGTTCAACTA<br>GCAGACCATTATCAACAAAATACTCCAATTGGCGATGGCCCTGTCCTTTTACCAGACAAC<br>CATTACCTGCACACACAATCTGTCCTTTGAAAGATCCCAACGAAAAGCGTGACCACAT<br>GGTCCTTCTTGAGTTTGTAACTGCTGCTGGGATTACACATGGCATGGATGAGCTCTACA<br>AATAA                                                                                                                                                | This study |
| <b>ER-Superfolder pHluorin</b><br>(SSBiP-sfpHluorin-HDEL) | ATGTTTTTCAACAGACTAAGCGCTGGCAAGCTGCTGGTACCCTCTCCGTGGTCCTGTA<br>CGCCCTTTTCTGTGTAATATTACCTTTACAGAATCTTTCCACTCCTCCAATGTTTTAGTT<br>AGAGGTAGCAAAGGAGAAGAAGAACTTTTCACTGGAGTTGTCCAATTCTTGTGAATTAGA<br>TGGTGATGTTAATGGGCACAAATTTTCTGTCCGTGGAGAGGGTGAAGGTGATGCTACAA<br>ACGAAAACCTCACCTTAAATTTATTTGCACTACTGGAAAACCTGTTCCGTGGCCAA<br>CACTTGTCACTACTCTGTCTTATGGTGTTCATGCTTTTCCCGTTATCCGGATCACATGA<br>AACGGCATGACTTTTTCAAGAGTGCCATGCCCGAAGGTTATGTACAGGAACGCACATA<br>TCTTTCAAAGATGACGGGACCTACAAGACGCGTGCTGAAGTCAAGTTTGAAGGTGATAC<br>CCTTGTTAATCGTATCGAGTTAAAGGGTATTGATTTTAAAGAAGATGGAAACATTCTTGG<br>ACACAACTCGAGTACAACCTTAAACGAGCACTTGGTATACATCACGGCAGACAAACAAA<br>AGAATGGAACCAAAGCTATCTTCAAGTTCACCACAACGTTGAAGATGGTTCCGTTCAA<br>CTAGCAGACCATTATCAACAAAATACTCCAATTGGCGATGGCCCTGTCCTTTTACCAGAC<br>AACCATTACCTGCACACACAATCTGTCCTTTGAAAGATCCCAACGAAAAGCGTGACCA<br>CATGGTCCTTCTTGAGTTTGTAACTGCTGCTGGGATTACACATGGCATGGATGAGCTCT<br>ACAAATTCGAACACGACGAATTGTAG | This study |

**Table S2. Plasmids used in this study**

| Plasmids                               | Characteristics                                                                                        | Reference              |
|----------------------------------------|--------------------------------------------------------------------------------------------------------|------------------------|
| <b>Plasmids used for fermentations</b> |                                                                                                        |                        |
| p426MET25                              | 2 $\mu$ , <i>URA3</i> , <i>Amp<sup>r</sup></i> , <i>MET25<sub>pr</sub></i> , <i>CYC1<sub>ter</sub></i> | (Mumberg et al., 1995) |
| MRV55                                  | p426MET25, sfpHluorin                                                                                  | This study             |
| MRV65                                  | p426MET25 SSKar2-sfpHluorin-HDEL (ER-pHluorin)                                                         | This study             |
| MRV66                                  | p426MET25 SSKar2-sfpHluorin-HDEL (ER-sfpHluorin)                                                       | This study             |

**Table S3. Primers used in this study**

| Primer name | Sequence 5'-3'                                                                    | Application                                                                        |
|-------------|-----------------------------------------------------------------------------------|------------------------------------------------------------------------------------|
| MOP291      | GCGTCTGTTAGAAAAGGAAGTTTTTCC                                                       | Binding in <i>MET25</i> <sup>prom</sup> , sequencing, forward                      |
| MOP290      | ACCTAGACTTCAGGTTGTC                                                               | Binding in <i>CYC1</i> <sup>term</sup> , sequencing, reverse                       |
| MRP57       | AATTCTATTACCCCATCCATACTACTAGAAATGAGTAAAGGAGAAACTTTTC                              | Binding <i>pHluorin</i> , overhang to <i>MET25</i> <sup>prom</sup> , forward       |
| MOP252      | TAAGCGTGACATAACTAATTACATGACTCGAGTTATTTGTATAGTTCATCCATGC                           | Binding <i>pHluorin</i> , overhang to <i>CYC1</i> <sup>term</sup> , reverse        |
| JTP96       | AATTCTATTACCCCATCCATACTACTAGAAATGAGCAAAGGAGAAACTTTTC                              | Binding <i>superfolderGFP</i> , overhang to <i>MET25</i> <sup>prom</sup> , forward |
| MRP85       | TTGAACACCATAAGACAGAGTAGTGACAAGTGTGG                                               | Introducing mutation T65S, reverse                                                 |
| MRP86       | CTTGTCACTACTGTCTTATGGTGTTCATGCTTTTCCC                                             | Introducing mutation T65S, reverse                                                 |
| MRP87       | TCCATTCTTTTGTGCTGCCGTGATGTATACCAAGTCTCGTTAAAGTTGTACT<br>CGAGTTTGTG                | Introducing mutation S147E, N149L, reverse                                         |
| MRP88       | TACATCACGGCAGACAAAACAAAAGAATGGAACCAAAGCTATCTTCCAAAGTTC<br>ACCACAAACGTTGAAGATGGTTC | Introducing mutation I161T, N164I, K166Q, I167V, R168H, forward                    |
| MRP89       | AGGACAGATTGTGTGCAGGTAATGGTTGTCTGGTAAAAG                                           | Introducing mutation S202H, reverse                                                |
| MRP90       | CAACCATTACCTGCACACACAATCTGTCTTCGAAAAG                                             | Introducing mutation S202H, forward                                                |
| JRP97       | AATGTAAGCGTGACATAACTAATTACATGATTATTTGTAGAGCTCATCCATGC                             | Binding <i>superfolderGFP</i> , overhang to <i>CYC1</i> <sup>term</sup> , reverse  |
| MRP07       | AATTCTATTACCCCATCCATACTACTAGAAATGTTTTTCAACAGACTAAGC                               | Binding KAR2 signal sequence, overhang to <i>MET25</i> <sup>prom</sup> , forward   |
| JTP89       | ACCTCTAACTAAACATTGGAGGAGTGGAAAAG                                                  | Binding KAR2 signal sequence, reverse                                              |
| JTP92       | CTTTCCACTCCTCCAATGTTTTAGTTAGAGGTAGCAAAGGAGAAACTTTTC                               | Binding superfolder GFP/pHluorin, overhang to KAR2 signal sequence, forward        |
| JRP93       | GACTACAAATTCGTGCTCGAATTTGTAGAGCTCATCCATGC                                         | Binding superfolder GFP/pHluorin, introducing ER-retention tag, reverse            |
| MRP06       | AATGTAAGCGTGACATAACTAATTACATGACTACAAATTCGTGCTGTTCCG                               | Binding ER-retention tag, overhang to <i>CYC1</i> <sup>term</sup> , reverse        |

**Table S4. Sigmoidal dose-response fits****A) sfpHluorin (0 mM methionine)**

|                                 |                          |
|---------------------------------|--------------------------|
| <b>Best-fit values</b>          |                          |
| Bottom                          | 0,6462                   |
| Top                             | 2,316                    |
| LogEC50                         | 6,929                    |
| EC50                            | 8,488e+006               |
| <b>Std. Error</b>               |                          |
| Bottom                          | 0,03232                  |
| Top                             | 0,03051                  |
| LogEC50                         | 0,04939                  |
| <b>95% Confidence Intervals</b> |                          |
| Bottom                          | 0.5795 to 0.7129         |
| Top                             | 2.253 to 2.379           |
| LogEC50                         | 6.827 to 7.031           |
| EC50                            | 6.712e+006 to 1.073e+007 |
| <b>Goodness of Fit</b>          |                          |
| Degrees of Freedom              | 24                       |
| R <sup>2</sup>                  | 0,9862                   |
| Absolute Sum of Squares         | 0,1624                   |
| Sy.x                            | 0,08227                  |

**B) ER-sfpHluorin (0 mM methionine)**

|                                 |                          |
|---------------------------------|--------------------------|
| <b>Best-fit values</b>          |                          |
| Bottom                          | 0,5025                   |
| Top                             | 2,240                    |
| LogEC50                         | 7,273                    |
| EC50                            | 1,874e+007               |
| <b>Std. Error</b>               |                          |
| Bottom                          | 0,05035                  |
| Top                             | 0,06296                  |
| LogEC50                         | 0,08509                  |
| <b>95% Confidence Intervals</b> |                          |
| Bottom                          | 0.3986 to 0.6064         |
| Top                             | 2.110 to 2.370           |
| LogEC50                         | 7.097 to 7.448           |
| EC50                            | 1.251e+007 to 2.809e+007 |
| <b>Goodness of Fit</b>          |                          |
| Degrees of Freedom              | 24                       |
| R <sup>2</sup>                  | 0,9601                   |
| Absolute Sum of Squares         | 0,5114                   |
| Sy.x                            | 0,1460                   |
